# Supplementary material
Source: publisher figshare collection journal article supplement (https://asha.figshare.com/articles/dataset/_/6170309)
Supplement: Supplementary file 1 [file 1]

## Supplemental Materials 2. Supplemental Tables S2 and S3.

**Supplemental Table S2.** Bias of the simulated adaptive and static short forms with respect to the full Philadelphia Naming Test (PNT) and their respective PNT complement tests, and comparisons between the adaptive and static short forms.

| Short Form             | Full PNT           |                 | PNT Complement |                 |
|------------------------|--------------------|-----------------|----------------|-----------------|
|                        | Estimate           | 95% CI          | Estimate       | 95%CI           |
| PNT-CAT30              | 0.058**            | [0.018, 0.102]  | 0.074*         | [0.016, 0.133]  |
| PNT-CATVL              | 0.042*             | [0.004, 0.079]  | 0.042          | [-0.016, 0.101] |
| PNT30A                 | 0.044              | [-0.01, 0.097]  | 0.048          | [-0.012, 0.109] |
| PNT30B                 | 0.043 <sup>+</sup> | [-0.005, 0.089] | 0.044          | [-0.011, 0.097] |
| Short Form Comparisons |                    |                 |                |                 |
| PNT-CAT30 – PNT30A     | 0.015              | [-0.055, 0.077] | 0.026          | [-0.061, 0.108] |
| PNT-CAT30 – PNT30B     | 0.016              | [-0.041, 0.072] | 0.03           | [-0.044, 0.103] |
| PNT-CATVL – PNT30A     | -0.002             | [-0.073, 0.059] | -0.005         | [-0.09, 0.081]  |
| PNT-CATVL – PNT30B     | -0.001             | [-0.058, 0.056] | -0.001         | [-0.075, 0.077] |

Note. CI = confidence interval.

\*Significantly different from 0,  $p < 0.05$ . \*\*Significantly different from 0,  $p < 0.01$ . <sup>+</sup>Significantly different from 0,  $p < 0.10$ .

**Supplemental Table S3.** Variable Error of the simulated adaptive and static short forms with respect to the full Philadelphia Naming Test (PNT) and their respective PNT complement tests, and comparisons between the adaptive and static short forms.

| Short Form             | Full PNT |                   | PNT Complement |                 |
|------------------------|----------|-------------------|----------------|-----------------|
|                        | Estimate | 95% CI            | Estimate       | 95% CI          |
| PNT-CAT30              | 0.333    | [0.302, 0.373]    | 0.471          | [0.429, 0.525]  |
| PNT-CATVL              | 0.306    | [0.281, 0.339]    | 0.479          | [0.437, 0.532]  |
| PNT30A                 | 0.425    | [0.383, 0.474]    | 0.485          | [0.44, 0.537]   |
| PNT30B                 | 0.381    | [0.347, 0.427]    | 0.438          | [0.4, 0.491]    |
| Short Form Comparisons |          |                   |                |                 |
| PNT-CAT30 – PNT30A     | –0.092** | [–0.142, –0.039]  | –0.014         | [–0.077, 0.054] |
| PNT-CAT30 – PNT30B     | –0.048*  | [–0.097, –0.0001] | 0.032          | [–0.035, 0.098] |
| PNT-CATVL – PNT30A     | –0.119** | [–0.173, –0.067]  | –0.005         | [–0.063, 0.051] |
| PNT-CATVL – PNT30B     | –0.075** | [–0.127, –0.026]  | 0.041          | [–0.015, 0.093] |

Note. CI = confidence interval.

\*Significantly different from 0,  $p < 0.05$ . \*\*Significantly different from 0,  $p < 0.01$ .
